# Supplementary material
Source: publisher site journal article supplement (https://www.dovepress.com/article/340471)
Supplement: Supplementary file 1 [file get_supplementary_file.php]

Table S1 IHC score of CtBP1, CK, E-cadherin and vimentin expression in sHCC area and cHCC area in 13 cases of sHCC

| Case  Number | CtBP1 | | CK | | E-cadherin | | vimentin | |
| --- | --- | --- | --- | --- | --- | --- | --- | --- |
| sHCC area | cHCC area | sHCC area | cHCC area | sHCC area | cHCC area | sHCC area | cHCC area |
| 1 | 9 | NS | 1 | NS | 1 | NS | 9 | NS |
| 2 | 9 | NS | 0 | NS | 1 | NS | 9 | NS |
| 3 | 9 | 3 | 1 | 9 | 0 | 9 | 6 | 0 |
| 4 | 9 | 2 | 1 | 9 | 1 | 6 | 9 | 0 |
| 5 | 9 | 4 | 1 | 9 | 0 | 3 | 9 | 1 |
| 6 | 9 | NS | 1 | NS | 1 | NS | 9 | NS |
| 7 | 9 | 3 | 0 | 9 | 0 | 6 | 9 | 0 |
| 8 | 6 | 0 | 0 | 9 | 0 | 4 | 6 | 0 |
| 9 | 9 | NS | 1 | NS | 0 | NS | 6 | NS |
| 10 | 9 | NS | 2 | NS | 0 | NS | 9 | NS |
| 11 | 9 | 3 | 1 | 9 | 1 | 4 | 9 | 0 |
| 12 | 6 | 4 | 2 | 9 | 0 | 9 | 6 | 1 |
| 13 | 9 | NS | 1 | NS | 0 | NS | 6 | NS |

IHC, immunohistochemistry; CtBP1, C-terminal binding protein 1; CK, pan-cytokeratin; sHCC, sarcomatoid hepatocellular carcinoma; cHCC, classical hepatocellular carcinoma; NS, no classical hepatocellular carcinoma area identified.

Table S2 Summary of information of antibodies

| Name | Supplier | Catalog  number | Clone name | Host species | Application | Dilution |
| --- | --- | --- | --- | --- | --- | --- |
| Primary antibodies |  |  |  |  |  |  |
| CtBP1 | Santa Cruz | sc-17805 | C1 | mouse | IHC  WB | 1:100  1:500 |
| pan-Cytokeratin | Santa Cruz | sc-81714 | AE1/AE3 | mouse | IHC-P | 1:100 |
| E-cadherin | Invitrogen | 33-4000 | 4A2C7 | mouse | IHC-P  WB | 1:200  1:500 |
| vimentin | Invitrogen | MA5-16409 | SP20 | rabbit | IHC-P  WB | 1:100  1:800 |
| HIF-1α | Novus Biologicals | NB100-479 | OTI2B3 | rabbit | IHC-P  WB | 1:200  1:1000 |
| β-actin | Santa Cruz | sc-8432 | C2 | mouse | WB | 1:1000 |
| α-tubulin | Santa Cruz | sc-5286 | B-7 | mouse | IF | 1:100 |
| Secondary antibodies |  |  |  |  |  |  |
| EliVisonTM Plus mouse/rabbit kit | MAXIM biotechnologies | KIT-9902 | - | - | IHC-P | Ready-to-use |
| anti-mouse Alexa Fluor 488 | ThermoFisher Scientific | A-10680 | - | goat | IF | 1:1000 |
| anti-mouse IgG-HRP | Santa Cruz | sc-2005 | - | goat | WB | 1:1000 |
| anti-rabbit IgG-HRP | Santa Cruz | sc-2004 | - | goat | WB | 1:1000 |

IHC-P, immunohistochemistry-paraffin; WB, western blot; IF, immunofluorescence.
